# Supplementary material
Source: publisher site journal article supplement (https://www.dovepress.com/article/470605)
Supplement: Supplementary file 1 [file get_supplementary_file.php]

# Supplementary data

**Supplementary Table S1** ICD codes used to identify uUTI, diabetes mellitus and menopause

| **Diagnosis** | **Description** |
| --- | --- |
| uUTI | |
| ICD-10 codes |  |
| N30.0 | Acute cystitis |
| N30.9 | Cystitis, unspecified |
| N39.0 | Urinary tract infection, site not specified |
| N10 | Acute pyelonephritis |
| N20–N23 | Urolithiasis (stones) |
| N31 | Neuromuscular dysfunction of bladder, not elsewhere classified |
| N32 | Other disorders of bladder |
| N39.3 | Stress incontinence (female) (male) |
| N39.4 | Other specified urinary incontinence |
| N39.8 | Other specified disorders of urinary system |
| N39.9 | Disorder of urinary system, unspecified |
| K58 | Irritable bowel syndrome |
| K59.2 | Neurogenic bowel, not elsewhere classified |
| K59.9 | Functional intestinal disorder, unspecified |
| N76.0 | Vaginitis |
| N77.1 | Vaginitis, vulvitis and vulvovaginitis in diseases classified elsewhere |
| B37.3 | Candidiasis of vulva and vagina |
| ICD-9 codes |  |
| 595 | Cystitis |
| 595.0 | Cystitis, acute |
| 595.9 | Vesicle infection/cystitis |
| 599.0 | Urinary tract infection NOS |
| 590.1 | Acute pyelonephritis |
| Diabetes mellitus |  |
| ICD-10 codes |  |
| E10 | Type 1 diabetes mellitus |
| E11 | Type 2 diabetes mellitus |
| E13 | Other specified diabetes mellitus |
| Menopause |  |
| ICD-10 codes |  |
| N95 | Menopausal and other perimenopausal disorders |
| E89.4 | Postprocedural ovarian failure |
| E28.31 | Premature menopause |

**Abbreviations:** ICD, International Statistical Classification of Diseases and Related Health Problems; NOS, not otherwise specified; uUTI, uncomplicated urinary tract infection.

**Supplementary Table S2** Incidence proportion of reference primary UPEC-uUTI cases followed by new episodes of uUTI, by demographic characteristics and risk factors, considering a 30-day interval between events, San Francisco, United States, 2014–2019

| **Variable** | **N** | **n** | **Incidence proportion (%; 95% CI)** |
| --- | --- | --- | --- |
| Overall cohort | 1105 | 275 | 24.9 (22.4–27.5) |
| Cohort for each evaluable year | | | |
| 2014 | 308 | 82 | 26.6 (21.8–31.9) |
| 2016 | 377 | 95 | 25.2 (20.9–29.9) |
| 2018 | 420 | 98 | 23.3 (19.4–27.7) |
| Gender |  |  |  |
| Male | 149 | 45 | 30.2 (23.0–38.3) |
| Female | 956 | 230 | 24.1 (21.4–26.9) |
| Age categorya |  |  |  |
| 18–50 years | 498 | 104 | 20.9 (17.4–24.7) |
| 51–64 years | 316 | 92 | 29.1 (24.2–34.5) |
| ≥65 years | 291 | 79 | 27.1 (22.1–32.6) |
| >50 years | 607 | 171 | 28.2 (24.6–31.9) |
| Presence of diabetes mellitusa |  |  |  |
| Yes | 366 | 131 | 35.8 (30.9–40.9) |
| No | 739 | 144 | 19.5 (16.7–22.5) |
| Presence of obesitya, b |  |  |  |
| Yes | 329 | 111 | 33.7 (28.6–39.1) |
| No | 584 | 150 | 25.7 (22.2–29.4) |
| Presence of menopausea |  |  |  |
| Yes | 160 | 68 | 42.5 (34.7–50.6) |
| No | 796 | 162 | 20.4 (17.6–23.3) |
| Prior UTI eventa, c |  |  |  |
| Yes | 147 | 66 | 44.9 (36.7–53.3) |
| No | 958 | 209 | 21.8 (19.2–24.6) |

**Notes:** a At the time of the reference primary infection.

b Obesity was defined as having a body mass index ≥30 kg/m2.

c A prior UTI event was defined as a uUTI episode diagnosed up to 12 months before the reference primary infection for patients ≥18 years of age, and before turning 18 for patients aged 18 years.

**Abbreviations:** CI, confidence interval; n, number of cases with ≥1 new episode of uUTI; N, number of UPEC-uUTI cases in the evaluable calendar years and in a given category; UPEC, uropathogenic *E. coli*; UTI, urinary tract infection; uUTI, uncomplicated urinary tract infection.

**Supplementary Table S3** Class of antimicrobials prescribed for UPEC-uUTI episodes

| **Episode** | **Class of antimicrobial** | **2014** | | | **2016** | | | **2018** | | | **Overall** | | |
| --- | --- | --- | --- | --- | --- | --- | --- | --- | --- | --- | --- | --- | --- |
| **N** | **n** | **%** | **N** | **n** | **%** | **N** | **n** | **%** | **N** | **n** | **%** |
| Reference primary infection | Levofloxacin | 145 | 1 | 0.7 | 156 | 2 | 1.3 | 146 | 2 | 1.4 | 447 | 5 | 1.1 |
| Ciprofloxacin | 145 | 31 | 21.4 | 156 | 20 | 12.8 | 146 | 18 | 12.3 | 447 | 69 | 15.4 |
| Nitrofurantoin | 145 | 26 | 17.9 | 156 | 30 | 19.2 | 146 | 24 | 16.4 | 447 | 80 | 17.9 |
| TMP/SMZ | 145 | 56 | 38.6 | 156 | 44 | 28.2 | 146 | 44 | 30.1 | 447 | 144 | 32.2 |
| Ampicillin | 145 | 0 | 0 | 156 | 0 | 0 | 146 | 0 | 0 | 447 | 0 | 0 |
| Different antibiotica | 145 | 10 | 6.9 | 156 | 31 | 19.9 | 146 | 26 | 17.8 | 447 | 67 | 15.0 |
| Combination of ciprofloxacin and TMP/SMZ | 145 | 3 | 2.1 | 156 | 3 | 1.9 | 146 | 6 | 4.1 | 447 | 12 | 2.7 |
| Combination of nitrofurantoin and TMP/SMZ | 145 | 6 | 4.1 | 156 | 8 | 5.1 | 146 | 3 | 2.1 | 447 | 17 | 3.8 |
| Combination of TMP/SMZ and different antibiotica | 145 | 7 | 4.8 | 156 | 5 | 3.2 | 146 | 9 | 6.2 | 447 | 21 | 4.7 |
| Other combinations | 145 | 5 | 3.4 | 156 | 13 | 8.3 | 146 | 14 | 9.6 | 447 | 32 | 7.2 |
| First new episode of uUTI | Levofloxacin | 50 | 1 | 2.0 | 60 | 1 | 1.7 | 59 | 1 | 1.7 | 169 | 3 | 1.8 |
| Ciprofloxacin | 50 | 9 | 18.0 | 60 | 7 | 11.7 | 59 | 9 | 15.3 | 169 | 25 | 14.8 |
| Nitrofurantoin | 50 | 5 | 10.0 | 60 | 10 | 16.7 | 59 | 7 | 11.9 | 169 | 22 | 13.0 |
|  | TMP/SMZ | 50 | 14 | 28.0 | 60 | 12 | 20.0 | 59 | 13 | 22.0 | 169 | 39 | 23.1 |
|  | Ampicillin | 50 | 0 | 0 | 60 | 0 | 0 | 59 | 0 | 0 | 169 | 0 | 0 |
|  | Different antibiotica | 50 | 7 | 14.0 | 60 | 11 | 18.3 | 59 | 11 | 18.6 | 169 | 29 | 17.2 |
|  | Combination of ciprofloxacin and TMP/SMZ | 50 | 2 | 4.0 | 60 | 3 | 5.0 | 59 | 1 | 1.7 | 169 | 6 | 3.6 |
|  | Combination of nitrofurantoin and TMP/SMZ | 50 | 1 | 2.0 | 60 | 3 | 5.0 | 59 | 4 | 6.8 | 169 | 8 | 4.7 |
|  | Combination of TMP/SMZ and different antibiotica | 50 | 6 | 12.0 | 60 | 1 | 1.7 | 59 | 6 | 10.2 | 169 | 13 | 7.7 |
|  | Other combinations | 50 | 5 | 10.0 | 60 | 12 | 20.0 | 59 | 7 | 11.9 | 169 | 24 | 14.2 |
| From second new episode of uUTI on | Levofloxacin | 24 | 1 | 4.2 | 66 | 1 | 1.5 | 49 | 1 | 2.0 | 139 | 3 | 2.2 |
| Ciprofloxacin | 24 | 1 | 4.2 | 66 | 5 | 7.6 | 49 | 4 | 8.2 | 139 | 10 | 7.2 |
| Nitrofurantoin | 24 | 4 | 16.7 | 66 | 4 | 6.1 | 49 | 3 | 6.1 | 139 | 11 | 7.9 |
| TMP/SMZ | 24 | 6 | 25.0 | 66 | 14 | 21.2 | 49 | 6 | 12.2 | 139 | 26 | 18.7 |
|  | Ampicillin | 24 | 0 | 0 | 66 | 0 | 0 | 49 | 0 | 0 | 139 | 0 | 0 |
|  | Different antibiotica | 24 | 9 | 37.5 | 66 | 10 | 15.2 | 49 | 19 | 38.8 | 139 | 38 | 27.3 |
|  | Combination of ciprofloxacin and TMP/SMZ | 24 | 0 | 0 | 66 | 0 | 0 | 49 | 2 | 4.1 | 139 | 2 | 1.4 |
|  | Combination of nitrofurantoin and TMP/SMZ | 24 | 0 | 0 | 66 | 3 | 4.5 | 49 | 2 | 4.1 | 139 | 5 | 3.6 |
|  | Combination of TMP/SMZ and different antibiotica | 24 | 1 | 4.2 | 66 | 3 | 4.5 | 49 | 1 | 2.0 | 139 | 5 | 3.6 |
|  | Other combinations | 24 | 2 | 8.3 | 66 | 26 | 39.4 | 49 | 11 | 22.4 | 139 | 39 | 28.1 |

**Notes:** a An antibiotic other than levofloxacin, ciprofloxacin, nitrofurantoin, TMP/SMZ, and ampicillin.

**Abbreviations:** N, number of UPEC-uUTI cases in the specified evaluable calendar years for which ≥1 prescription of antimicrobials related to the UPEC-uUTI episode was retrieved, in a given category; n/%, number/percentage of UPEC-uUTI cases with ≥1 prescription of the specified class of antimicrobial related to the episode of UPEC-uUTI in a given category; TMP/SMZ, trimethoprim/sulfamethoxazole; UPEC-uUTI, uropathogenic *E. coli*-uncomplicated urinary tract infection.

**Supplementary Table S4** Antimicrobial resistance to antimicrobial treatment prescribed for UPEC-uUTI episodes

| **Episode** | **Class of antimicrobial** | **2014** | | | **2016** | | | **2018** | | | **Overall** | | |
| --- | --- | --- | --- | --- | --- | --- | --- | --- | --- | --- | --- | --- | --- |
| **N** | **n** | **%** | **N** | **n** | **%** | **N** | **n** | **%** | **N** | **n** | **%** |
| Reference primary infection | Levofloxacin | 1 | 0 | 0 | 2 | 0 | 0 | 2 | 0 | 0 | 5 | 0 | 0 |
| Ciprofloxacin | 31 | 4 | 12.9 | 20 | 4 | 20.0 | 18 | 1 | 5.6 | 69 | 9 | 13.0 |
| Nitrofurantoin | 26 | 0 | 0 | 30 | 0 | 0 | 24 | 0 | 0 | 80 | 0 | 0 |
| TMP/SMZ | 56 | 15 | 26.8 | 44 | 11 | 25.0 | 44 | 18 | 40.9 | 144 | 44 | 30.6 |
| Ampicillin | 0 | 0 | 0 | 0 | 0 | 0 | 0 | 0 | 0 | 0 | 0 | 0 |
| Different antibiotica | 10 | 0 | 0 | 31 | 0 | 0 | 26 | 0 | 0 | 67 | 0 | 0 |
| Combination of ciprofloxacin and TMP/SMZ | 3 | 2 | 66.7 | 3 | 3 | 100 | 6 | 3 | 50.0 | 12 | 8 | 66.7 |
| Combination of nitrofurantoin and TMP/SMZ | 6 | 3 | 50.0 | 8 | 5 | 62.5 | 3 | 2 | 66.7 | 17 | 10 | 58.8 |
| Combination of TMP/SMZ and different antibiotica | 7 | 1 | 14.3 | 5 | 3 | 60.0 | 9 | 5 | 55.6 | 21 | 9 | 42.9 |
| Other combinations | 5 | 2 | 40.0 | 13 | 3 | 23.1 | 14 | 4 | 28.6 | 32 | 9 | 28.1 |
| First new episode of uUTI | Levofloxacin | 1 | 0 | 0 | 1 | 0 | 0 | 1 | 0 | 0 | 3 | 0 | 0 |
| Ciprofloxacin | 9 | 0 | 0 | 7 | 0 | 0 | 9 | 0 | 0 | 25 | 0 | 0 |
| Nitrofurantoin | 5 | 0 | 0 | 10 | 0 | 0 | 7 | 0 | 0 | 22 | 0 | 0 |
|  | TMP/SMZ | 14 | 0 | 0 | 12 | 1 | 8.3 | 13 | 1 | 7.7 | 39 | 2 | 5.1 |
|  | Ampicillin | 0 | 0 | 0 | 0 | 0 | 0 | 0 | 0 | 0 | 0 | 0 | 0 |
|  | Different antibiotica | 7 | 0 | 0 | 11 | 0 | 0 | 11 | 0 | 0 | 29 | 0 | 0 |
|  | Combination of ciprofloxacin and TMP/SMZ | 2 | 0 | 0 | 3 | 0 | 0 | 1 | 0 | 0 | 6 | 0 | 0 |
|  | Combination of nitrofurantoin and TMP/SMZ | 1 | 0 | 0 | 3 | 0 | 0 | 4 | 0 | 0 | 8 | 0 | 0 |
|  | Combination of TMP/SMZ and different antibiotica | 6 | 1 | 16.7 | 1 | 0 | 0 | 6 | 0 | 0 | 13 | 1 | 7.7 |
|  | Other combinations | 5 | 0 | 0 | 12 | 1 | 8.3 | 7 | 0 | 0 | 24 | 1 | 4.2 |
| From second new episode of uUTI on | Levofloxacin | 1 | 0 | 0 | 1 | 0 | 0 | 1 | 0 | 0 | 3 | 0 | 0 |
| Ciprofloxacin | 1 | 0 | 0 | 5 | 0 | 0 | 4 | 0 | 0 | 10 | 0 | 0 |
| Nitrofurantoin | 4 | 0 | 0 | 4 | 0 | 0 | 3 | 0 | 0 | 11 | 0 | 0 |
| TMP/SMZ | 6 | 1 | 16.7 | 14 | 1 | 7.1 | 6 | 0 | 0 | 26 | 2 | 7.7 |
|  | Ampicillin | 0 | 0 | 0 | 0 | 0 | 0 | 0 | 0 | 0 | 0 | 0 | 0 |
|  | Different antibiotica | 9 | 0 | 0 | 10 | 0 | 0 | 19 | 0 | 0 | 38 | 0 | 0 |
|  | Combination of ciprofloxacin and TMP/SMZ | 0 | 0 | 0 | 0 | 0 | 0 | 2 | 0 | 0 | 2 | 0 | 0 |
|  | Combination of nitrofurantoin and TMP/SMZ | 0 | 0 | 0 | 3 | 2 | 66.7 | 2 | 0 | 0 | 5 | 2 | 40.0 |
|  | Combination of TMP/SMZ and different antibiotica | 1 | 0 | 0 | 3 | 0 | 0 | 1 | 0 | 0 | 5 | 0 | 0 |
|  | Other combinations | 2 | 0 | 0 | 26 | 1 | 3.8 | 11 | 0 | 0 | 39 | 1 | 2.6 |

**Notes:** a An antibiotic other than levofloxacin, ciprofloxacin, nitrofurantoin, TMP/SMZ, and ampicillin.

**Abbreviations:** N, number of UPEC-uUTI cases in the specified evaluable calendar years for which ≥1 prescription of antimicrobials related to the UPEC-uUTI episode was retrieved, in a given category; n/%, number/percentage of UPEC-uUTI cases with ≥1 prescription of the specified class of antimicrobial related to the episode of UPEC-uUTI in a given category; TMP/SMZ, trimethoprim/sulfamethoxazole; UPEC-uUTI, uropathogenic *E. coli*-uncomplicated urinary tract infection.
